# Supplementary material
Source: MDPI journal article supplement (https://www.mdpi.com/2673-6373/3/2/21)
Supplement: s1 [file s1]

# Sepia Melanin-Loaded Primary Human Gingival Keratinocytes: An In Vitro Model for Studies on Pigmented Gingiva

Shilpi Goenka <sup>1,2</sup>

<sup>1</sup> Department of Biochemistry & Cell Biology, Stony Brook University, Stony Brook, NY 11794-5215, USA; shilp.goenka@gmail.com

<sup>2</sup> Department of Biomedical Engineering, Stony Brook University, Stony Brook, NY 11794-5281, USA

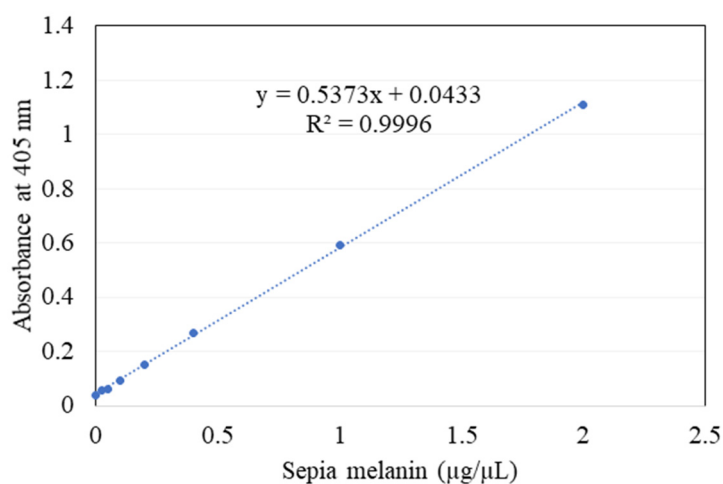

**Figure S1.** Standard curve for sepia melanin standard samples (0–200 µg; 0–2 µg/µL) according to the measured absorbances at 405 nm. Each data point is the mean ± SD of samples in duplicates.

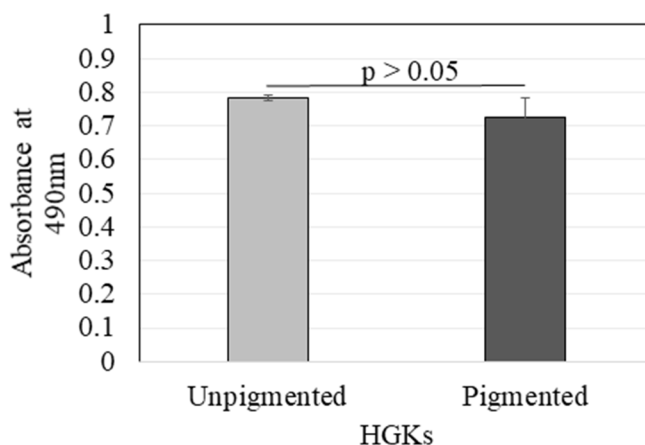

**Figure S2.** MTS assay absorbances of unpigmented HGKs and HGKs pigmented with 25 µg/mL sepia melanin; both groups were not significant ( $p > 0.05$ ) as analyzed by unpaired t-test; data are mean ± SD of three independent experiments.

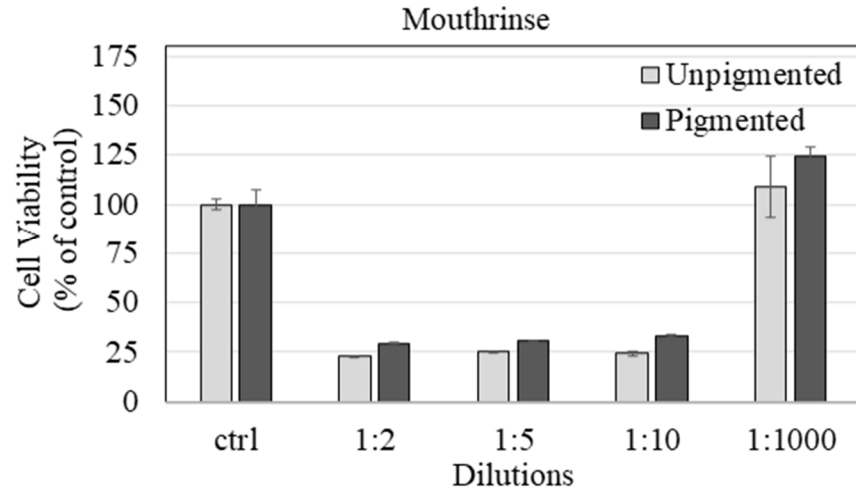

**Figure S3.** Viabilities of unpigmented and pigmented HGKs after treatment with mouthrinse at various dilutions for 24 h; Mouthrinse (considered 100 %) was diluted using culture medium to ratios of 1:2, 1:5, 1:10, and 1:1000 to yield concentrations of 50%, 20%, 10%, and 0.1% v/v, respectively; data are mean  $\pm$  SD of one experiment with duplicate determinations.

**Table S1.** Composition of mouthrinse used in this study.

| Mouthrinse                        | Distributor                              | Active ingredients                             | Inactive ingredients                                                                                                                                                                          |
|-----------------------------------|------------------------------------------|------------------------------------------------|-----------------------------------------------------------------------------------------------------------------------------------------------------------------------------------------------|
| Listerine Total Care (Fresh Mint) | Johnson & Johnson Consumer Inc., NJ, USA | Sodium fluoride 0.02% (0.01% w/v fluoride ion) | Water, alcohol (21.6% v/v), sorbitol, poloxamer 407, eucalyptol, flavor, menthol, methyl salicylate, phosphoric acid, thymol, sodium saccharin, disodium phosphate, sucralose, red 40, blue 1 |
